# Supplementary material for: Parallel analysis of tri-molecular biosynthesis with cell identity and function in single cells
Source: PubMed Central journal article supplement (PMC6414513; doi:10.1038/s41467-019-09128-7), 2019-03-12
Supplement: 41467_2019_9128_MOESM1_ESM.pdf [file 41467_2019_9128_MOESM1_ESM.pdf]

Supplementary material for:

KimmeY, et al., Parallel Analysis of Tri-molecular Biosynthesis with Cell Identity and Function  
in Single Cells

Contents (in order of appearance):

1. Supplementary Table 1-6
2. Supplementary Figure 1-6
3. Supplementary References

Kimmey, Supplementary Table 1. Mass-cytometry antibody staining panel for HeLa cell-cycle SOM3B analysis

| Metal | Mass | Antibody Target  | Staining uL | Concentration (Stock, ug/mL) | Concentration (Stain, ug/mL) | Manufacturer   | Clone      | Catalog #    | Cell Target                       |
|-------|------|------------------|-------------|------------------------------|------------------------------|----------------|------------|--------------|-----------------------------------|
| In    | 115  | A2B5             | 2.00        | 100                          | 2.00                         | Thermo         | 105        | 130-093-394  |                                   |
| I     | 127  | IdU              | -           | -                            | -                            | -              | -          | -            | DNA Synthesis                     |
| Nd    | 142  | Active_Caspase3  | 1.00        | 200                          | 2.00                         | BD             | C92-605    | 559565       | Apoptotic cells                   |
| Nd    | 143  | p4EBP1_Thr37/T46 | 2.00        | 200                          | 4.00                         | CST            | 236B4      | custom, 2855 | mTOR/AKT pathway                  |
| Sm    | 152  | pAKT_Thr308      | 2.00        | 50                           | 1.00                         | BD             | J1-223.371 | 558316       | mTOR/AKT pathway                  |
| Gd    | 156  | PBX1             | 3.00        | 100                          | 3.00                         | CST            | Polyclonal | custom, 4342 | Intranuclear transcription factor |
| Gd    | 158  | Puromycin        | 0.75        | 100                          | 0.75                         | MilliporeSigma | 12D10      | MABE343      | Protein synthesis                 |
| Dy    | 162  | Cyclin B1        | 2.00        | 200                          | 4.00                         | BD             | GNS-1      | 554177       | G2 phase                          |
| Ho    | 165  | rRNA             | 1.00        | 400                          | 4.00                         | Novus          | Y10b       | NB100-662    | Ribosomal RNA                     |
| Yb    | 171  | cPARP            | 1.00        | 200                          | 2.00                         | BD             | Asp214     | 552597       | Apoptotic cells                   |
| Yb    | 172  | pS6_Ser235/236   | 2.00        | 200                          | 4.00                         | BD             | N7-548     | custom       | mTOR/AKT pathway                  |
| Lu    | 175  | BRdU             | 2.00        | 200                          | 4.00                         | BD             | 3D4        | BDB555627    | RNA Synthesis                     |
| Yb    | 176  | p-HH3-Ser28      | 0.75        | 200                          | 1.50                         | BioLegend      | HTA28      | 641002       | Mitotic cells                     |
| Ir    | 191  | DNA Intercalator | -           | -                            | -                            | -              | -          | -            | DNA                               |
| Pt    | 195  | Cisplatin        | -           | -                            | -                            | -              | -          | -            | Viability                         |

= Extracellular  
 = Intracellular  
 = Non-antibody parameter

KimmeY, Supplementary Table 2. Mass-cytometry antibody staining panel for SOM3B analysis on *ex vivo* stimulated human whole blood monocleular cells

| Metal | Mass | SPADE | Antibody Target  | Staining uL | Concentration (Stock, ug/mL) | Concentration (Stain, ug/mL) | Manufacturer   | Clone      | Catalog #    | Cell Target             |
|-------|------|-------|------------------|-------------|------------------------------|------------------------------|----------------|------------|--------------|-------------------------|
| In    | 113  | No    | CD235ab          | 0.50        | 200                          | 1.00                         | BioLegend      | HIR2       | 306602       | Erythroid cell          |
| In    | 115  | No    | CD66             | 1.00        | 200                          | 0.30                         | BD             | B1.1/CD66  | 551354       | Granulocyte             |
| I     | 127  | No    | IdU              | -           | -                            | -                            | -              | -          | -            | DNA Synthesis           |
| La    | 139  | No    | CD61             | 0.25        | 200                          | 0.50                         | BioLegend      | VI-PL2     | 336402       | Platelet                |
| Ce    | 140  | No    | IgM              | 0.50        | 400                          | 2.00                         | Invitrogen     | Polyclonal | H15000       | B cell                  |
| Pr    | 141  | Yes   | CD7              | 1.00        | 200                          | 2.00                         | BD             | M-T701     | 555359       | T/NK cell               |
| Nd    | 142  | No    | Active_Caspase3  | 1.00        | 100                          | 1.00                         | BD             | C92-605    | 559565       | Apoptotic cells         |
| Nd    | 143  | No    | p4EBP1_Thr37/46  | 1.00        | 350                          | 3.50                         | CST            | 236B4      | custom, 2855 | mTOR/AKT pathway        |
| Nd    | 145  | No    | p-p38            | 2.00        | 100                          | 2.00                         | BD             | 36/p38     | 612288       | Signaling               |
| Nd    | 148  | No    | CD16             | 1.50        | 100                          | 1.50                         | Fluidigm       | 3G8        | 3148004B     | NK/Monocytes            |
| Sm    | 149  | No    | CD69             | 1.00        | 75                           | 0.75                         | BD             | FN50       | 555529       | Activation marker       |
| Nd    | 150  | Yes   | CD56             | 0.50        | 200                          | 1.00                         | BD             | NCAM16.2   | 559043       | NK cell                 |
| Eu    | 151  | Yes   | CD123            | 0.50        | 200                          | 1.00                         | BioLegend      | 6H6        | 306002       | Dendritic cell          |
| Sm    | 152  | No    | TNFalpha         | 1.00        | 100                          | 1.00                         | Fluidigm       | Mab11      | 3152002B     | Cytokine                |
| Eu    | 153  | No    | pSTAT1_Tyr701    | 2.00        | 100                          | 2.00                         | BD             | 4A         | custom       | Signaling               |
| Sm    | 154  | Yes   | CD45             | 1.00        | 75                           | 0.75                         | BioLegend      | HI30       | 304002       | Pan immune cell marker  |
| Gd    | 155  | No    | CD45RA           | 0.50        | 100                          | 0.50                         | Fluidigm       | HI100      | 3155011B     | Pan marker/Naive T Cell |
| Gd    | 157  | Yes   | CD4              | 1.00        | 400                          | 4.00                         | BioLegend      | RPA-T4     | 300502       | T cell subset           |
| Gd    | 158  | No    | Puromycin        | 1.00        | 100                          | 1.00                         | MilliporeSigma | 12D10      | MABE343      | Protein synthesis       |
| Tb    | 159  | Yes   | CD20             | 1.00        | 200                          | 2.00                         | BD             | 2H7        | 302302       | B cell                  |
| Dy    | 161  | Yes   | CD14             | 1.00        | 200                          | 2.00                         | BD             | M5E2       | 301802       | Monocyte                |
| Ho    | 165  | No    | rRNA             | 0.50        | 400                          | 2.00                         | Novus          | Y10b       | NB100-662    | Ribosomal RNA           |
| Er    | 166  | Yes   | CD19             | 0.30        | 500                          | 1.00                         | BioLegend      | HIB19      | 302202       | B cell                  |
| Er    | 167  | Yes   | CD38             | 0.20        | 200                          | 0.25                         | BioLegend      | HIT2       | 303502       | Plasma cell             |
| Er    | 168  | No    | IFNgamma         | 1.00        | 100                          | 1.00                         | Fluidigm       | B27        | 3168005B     | Cytokine                |
| Er    | 170  | Yes   | CD3              | 1.00        | 50                           | 0.50                         | BD             | UCHT1      | 555329       | Pan T cell              |
| Yb    | 171  | No    | pZAP70           | 1.00        | 100                          | 1.00                         | Fluidigm       | 17a        | 3171005A     | Signaling               |
| Yb    | 172  | No    | pS6_Ser235/236   | 1.00        | 200                          | 2.00                         | BD             | N7-548     | custom       | mTOR/AKT pathway        |
| Yb    | 173  | Yes   | CD11c            | 1.00        | 200                          | 2.00                         | BioLegend      | Bu15       | 337202       | Dendritic cell          |
| Lu    | 175  | No    | BRdU             | 2.00        | 200                          | 4.00                         | BD             | 3D4        | BDB555627    | RNA Synthesis           |
| Ir    | 191  | No    | DNA Intercalator | -           | -                            | -                            | -              | -          | -            | DNA                     |
| Pt    | 195  | No    | Cisplatin        | -           | -                            | -                            | -              | -          | -            | Viability               |
| Bi    | 209  | Yes   | HLA-DR           | 0.50        | 200                          | 1.00                         | BioLegend      | L243       | 307602       | MHC class II            |

= Extracellular  
 = Intracellular  
 = Non-antibody parameter

KimmeY, Supplementary Table 3. Evidence for manual annotation of whole blood mononuclear cell node groups in SPADE maps

| Group Name      | Reference | Evidence For                                | Note                                                    |
|-----------------|-----------|---------------------------------------------|---------------------------------------------------------|
| Platelets       | 3, 7, 8   | CD61+ CD45low                               | Used for <i>in silico</i> mononuclear cell purification |
| Red Blood Cells | 3, 7      | CD235ab+ CD45mid-low                        | Used for <i>in silico</i> mononuclear cell purification |
| Granulocytes    | 2, 3      | CD66+ CD45low                               | Used for <i>in silico</i> mononuclear cell purification |
| CD4+ T Cell     | 6, 7      | CD3+ CD4+ CD19- HLADR-                      |                                                         |
| CD4neg T Cells  | 6, 7      | CD3+ CD4neg CD19- HLADR-                    | CD8+ T cells                                            |
| B Cells         | 3, 6, 7   | CD20+ CD19+ HLADR+                          |                                                         |
| NK              | 6, 7      | CD56++ CD38het CD16het CD14- CD19-<br>CD20- |                                                         |
| CD16+ Monocyte  | 6         | CD14low CD16+                               |                                                         |
| CD14+ Monocyte  | 6         | CD14+ CD16neg                               |                                                         |
| cDC             | 6         | CD11c+ HLADR+ CD14-                         |                                                         |
| pDC             | 6, 7      | CD123+ HLADR+ CD14-                         |                                                         |
| Basophil        | 1         | CD38+ CD123+ CD19- HLADR-                   |                                                         |

Kimmy, Supplementary Table 4. Mass-cytometry antibody staining panel for SOM3B analysis on the healthy human hematopoietic continuum *ex vivo*

| Metal | Mass | SPADE | Wanderlust | Antibody Target       | Staining uL | Concentration (Stock, ug/mL) | Concentration (Stain, ug/mL) | Manufacturer   | Clone         | Catalog #       | Target Description                   |
|-------|------|-------|------------|-----------------------|-------------|------------------------------|------------------------------|----------------|---------------|-----------------|--------------------------------------|
| Y     | 89   | Yes   | No         | CD45                  | 0.80        | 500                          | 4.00                         | BioLegend      | 2D1           | 3089003B        | Pan immune cell marker               |
| In    | 113  | Yes   | No         | CD235ab               | 1.00        | 200                          | 2.00                         | BioLegend      | HIR2          | 306602          | Erythroid cell                       |
| In    | 115  | Yes   | No         | CD71                  | 1.50        | 200                          | 3.00                         | BioLegend      | CY1G4         | 334102          | Erythroid cell                       |
| I     | 127  | No    | No         | IdU                   | -           | -                            | -                            | -              | -             | -               | DNA Synthesis                        |
| La    | 139  | Yes   | No         | CD61                  | 0.50        | 200                          | 0.25                         | BioLegend      | VI-PL2        | 336402          | Megakaryocyte/platelet               |
| Ce    | 140  | Yes   | Yes        | IgM                   | 0.50        | 400                          | 2.00                         | Invitrogen     | Polyclonal    | H15000          | B cell                               |
| Pr    | 141  | Yes   | No         | CD7                   | 1.00        | 200                          | 2.00                         | BD             | M-T701        | 555359          | T & NK cell                          |
| Nd    | 142  | No    | No         | Active Caspase3       | 1.50        | 100                          | 1.50                         | BD             | C92-605       | 559565          | Apoptotic cells                      |
| Nd    | 143  | Yes   | Yes        | CD179b                | 2.00        | 200                          | 4.00                         | BioLegend      | HSL11         | 349802          | B cell progenitor                    |
| Nd    | 144  | Yes   | No         | CD11b                 | 4.00        | 100                          | 4.00                         | Fluidigm       | ICRF44        | 3209003B        | Myeloid                              |
| Nd    | 145  | Yes   | No         | CD4                   | 2.00        | 100                          | 2.00                         | Fluidigm       | RPA-T4        | 3145001B        | T cell subset                        |
| Nd    | 146  | Yes   | No         | CD8                   | 1.00        | 100                          | 1.00                         | Fluidigm       | RPA-T8        | 3146001B        | T cell subset                        |
| Sm    | 147  | Yes   | No         | CD11c                 | 2.00        | 100                          | 2.00                         | Fluidigm       | Bu15          | 3147008B        | Dendritic cell                       |
| Nd    | 148  | Yes   | Yes        | CD34                  | 2.00        | 200                          | 4.00                         | BioLegend      | 581           | 343502          | Hematopoiet stem cell & progenitors  |
| Sm    | 149  | Yes   | Yes        | CD179a                | 1.00        | 150                          | 1.50                         | BioLegend      | HSL96         | 347402          | B cell progenitor                    |
| Nd    | 150  | No    | No         | GATA3                 | 2.00        | 200                          | 4.00                         | BD             | L50-823       | 558686          | Intracellular Transcription Factor   |
| Eu    | 151  | Yes   | No         | CD123                 | 2.00        | 100                          | 2.00                         | Fluidigm       | 6H6           | 306002          | Dendritic cell                       |
| Sm    | 152  | Yes   | No         | CD10                  | 3.00        | 200                          | 6.00                         | BioLegend      | H110a         | 312202          | B cell progenitor                    |
| Eu    | 153  | Yes   | Yes        | CD19                  | 0.50        | 500                          | 2.50                         | BioLegend      | SJ25C1        | 363002          | B cell                               |
| Sm    | 154  | Yes   | No         | CD56                  | 0.33        | 200                          | 0.75                         | BD             | NCAM16.2      | 559043          | NK cell                              |
| Gd    | 155  | Yes   | No         | CD45RA                | 2.00        | 100                          | 2.00                         | Fluidigm       | Hi100         | 3155011B        | Pan marker/Naive T Cell              |
| Gd    | 156  | Yes   | No         | CD14                  | 1.00        | 100                          | 1.00                         | BioLegend      | M5E2          | 301802          | Monocyte                             |
| Gd    | 157  | Yes   | No         | CD66                  | 1.00        | 200                          | 2.00                         | BD             | B1.1          | 551354          | Granulocyte                          |
| Gd    | 158  | No    | No         | Puromycin             | 1.00        | 100                          | 1.00                         | MilliporeSigma | 12D10         | MABE343         | Protein synthesis                    |
| Tb    | 159  | Yes   | No         | Biotin (CD90-Biotin*) | 1 (0.5)     | 50 (500)                     | 0.50 (2.50)                  | BioLegend (BD) | 1D4-C5 (5E10) | 409002 (555594) | Hematopoiet stem cell & progenitors  |
| Gd    | 160  | Yes   | Yes        | CD24                  | 1.00        | 200                          | 2.00                         | BioLegend      | ML5           | 311102          | B cell progenitor                    |
| Dy    | 161  | Yes   | Yes        | CD20                  | 1.00        | 200                          | 2.00                         | BD             | 2H7           | 555621          | Immature B cell                      |
| Dy    | 162  | Yes   | No         | CD127                 | 3.00        | 200                          | 6.00                         | BioLegend      | HCD127        | 317602          | T cells (IL7Ralpha)                  |
| Dy    | 163  | Yes   | No         | CD36                  | 0.50        | 400                          | 2.00                         | BioLegend      | 5-271         | 336208          | Platelets & erythroid cell           |
| Dy    | 164  | Yes   | Yes        | TdT                   | 1.50        | 200                          | 3.00                         | BD             | E17-1519      | custom          | Terminal transferase enzyme          |
| Ho    | 165  | No    | No         | rRNA                  | 1.00        | 400                          | 4.00                         | Novus          | Y10B          | NB100-662       | Ribosomal RNA                        |
| Er    | 166  | No    | No         | FOXP1                 | 0.50        | 300                          | 1.50                         | CST            | D35D10        | 4402BF          | Intracellular Transcription Factor   |
| Er    | 167  | No    | No         | Ki67                  | 1.00        | 200                          | 2.00                         | BD             | B56           | 3168022D        | Intracellular Mitotic Factor         |
| Er    | 168  | Yes   | Yes        | CD38                  | 1.50        | 200                          | 3.00                         | BioLegend      | HIT2          | 303502          | Hematopoietic progenitor/plasma cell |
| Tm    | 169  | No    | No         | CD25                  | 1.00        | 200                          | 2.00                         | BioLegend      | BC96          | 302602          | IL2Ralpha chain                      |
| Er    | 170  | Yes   | No         | CD3                   | 2.00        | 50                           | 1.00                         | Fluidigm       | UCHT1         | 555329          | Pan T cell                           |
| Yb    | 171  | Yes   | No         | CD117                 | 2.00        | 100                          | 2.00                         | BioLegend      | 104D2         | 313202          | Hematopoietic rogenitor              |
| Yb    | 172  | No    | No         | pS6_Ser235/236        | 1.00        | 100                          | 1.00                         | BD             | N7-548        | custom          | mTOR/AKT pathway                     |
| Yb    | 173  | Yes   | No         | CD135                 | 1.50        | 100                          | 1.50                         | BioLegend      | BV10A4H2      | 313302          | FMS like tyrosine kinase (FLT3)      |
| Yb    | 174  | Yes   | No         | CD2                   | 1.00        | 200                          | 2.00                         | BioLegend      | TS1/8         | 309202          | T cells                              |
| Lu    | 175  | No    | No         | BRdU                  | 2.00        | 200                          | 4.00                         | BD             | 3D4           | BDB555627       | RNA Synthesis                        |
| Yb    | 176  | No    | No         | SATB1                 | 1.50        | 200                          | 3.00                         | Sigma          | SAT-5         | SAB4200481      | Intracellular Transcription Factor   |
| Ir    | 191  | No    | No         | DNA Intercalator      | -           | -                            | -                            | -              | -             | -               | DNA                                  |
| Pt    | 195  | No    | No         | Cisplatin             | -           | -                            | -                            | -              | -             | -               | Viability                            |
| Bi    | 209  | Yes   | No         | HLA-DR                | 1.50        | 200                          | 3.00                         | BioLegend      | L243          | 307602          | MHC class II                         |

= Extracellular  
 = Intracellular  
 = Non-antibody parameter

\* anti-CD90-Biotin antibody included in extracellular stain, anti-Biotin included in intracellular stain.  
(anti-CD90 reagent information in parentheses)

KimmeY, Supplementary Table 5. Evidence for manual annotation of bone marrow mononuclear cell node groups in SPADE maps

| Group Name                      | Reference | Phenotype                                                   |
|---------------------------------|-----------|-------------------------------------------------------------|
| HSC                             | 5, 7      | CD34++ CD90++ CD45low CD38neg                               |
| Early Progenitor (EP)           | 5, 7      | CD34++ CD90++ CD45low CD38+                                 |
| Intermediate Progenitor (IP)    | 5, 7      | CD34mid CD38+                                               |
| Late Progenitor (LP)            | 5, 7      | CD34+/- CD38+ TdT-het                                       |
| GMP                             | 4, 7      | CD34+ CD38+ CD123+(low) CD45RA+                             |
| MEP                             | 3, 4, 7   | CD34+ CD38+ CD123neg CD45RAneg                              |
| Pro Erythroblast                | 2, 3, 7   | CD34het CD36+ CD38+ CD71+ CD45RAneg CD123neg CD235ab-neg    |
| Basophilic Erythroblast         | 3, 7      | CD38het CD36++ CD71+ CD34neg CD45RAneg CD123neg CD235ab-neg |
| Polychromatophilic Erythroblast | 3, 7      | CD36++ CD71+ CD235ab+ CD34neg CD38neg CD45RAneg CD123neg    |
| Pro B                           | 2, 7      | TdT+ CD34+ CD38+ CD179a+ CD179b+ CD19neg CD24neg            |
| Pre B I                         | 2, 7      | TdT+ CD34het CD38+ CD24+ CD19low CD179a+ CD179b+            |
| Pre B II                        | 2, 7      | CD19+ CD20het IgM+ CD38+ CD179a+ CD179b+ CD34neg            |
| Early Immature B (E-iB)         | 2, 7      | CD19+ CD20het IgM+ CD38+ CD179a-neg CD179b-neg              |
| Immature B (iB)                 | 2, 7      | CD19+ CD20+ IgM+                                            |
| Plasma Cells                    | 9, 2, 6   | CD19+ CD38+++ CD45low CD20neg                               |
| Monoblast (Mb)                  | 2, 3, 7   | CD38+ HLADR+ CD45RA+ CD123+ CD11c+                          |
| Promonocyte                     | 2, 3, 7   | HLADR+ CD11b+ CD36+ CD45+ CD14low                           |
| Monocyte                        | 2, 3      | HLADR+ CD11b++ CD36+++ CD45+ CD14+                          |
| Myeloid                         | 7         | CD14het CD36+ HLADRhet                                      |
| Platelet                        | 8         | CD61++, CD36++, CD14neg                                     |
| cDCs                            | 6         | HLADR+ CD11c+ CD123neg CD14neg                              |
| Pre pDCs                        | 7         | HLADR+ CD11b+ CD36++ CD45+ CD38high                         |
| pDCs                            | 6, 7      | HLADR+ CD11b+ CD36++ CD45+ CD38low                          |
| Basophils (Baso)                | 1         | CD123++ CD38+ HLA-DRneg CD11bneg                            |
| Promyelo/myelocyte (P/M)        | 2, 3      | CD66mid/high CD38+ HLADR                                    |
| Neutrophils                     | 2, 3      | CD66+ HLADRneg                                              |
| NK                              | 6, 7      | CD7+ CD56+ CD3neg                                           |
| NKT                             | 7, 8      | CD3+ CD7+ CD56het CD4neg CD8neg CD45RAneg                   |
| Double Negative T               | 10        | CD3+ CD45RA+ CD4neg, CD8neg                                 |
| CD8+ Naïve (CD8+N)              | 6, 7      | CD3+ CD8a+ CD45RA+                                          |
| CD8+ Memory (CD8+M)             | 6, 7      | CD3+ CD8a+ CD45RAneg                                        |
| CD4+ Naïve (CD4+N)              | 6, 7      | CD3+ CD4+ CD45RA+                                           |
| CD4+ Memory (CD4+M)             | 6, 7      | CD3+ CD4+ CD45RAneg                                         |

Kimmey, Supplementary Table 6. Raw cell event counts and p-values for bone marrow mononuclear cell phenotypic clusters

| Phenotypic Cluster              | Figure 5 - Donor 1 |                                                  |          | Figure S6 - Donor 2 |                                                  |          |
|---------------------------------|--------------------|--------------------------------------------------|----------|---------------------|--------------------------------------------------|----------|
|                                 | Raw Cell Number    | BRU & Puromycin vs HSC (Friedman-Rafsky p-value) | p symbol | Raw Cell Number     | BRU & Puromycin vs HSC (Friedman-Rafsky p-value) | p symbol |
| HSC                             | 1921               | 0.611741884                                      |          | 1334                | 0.664898499                                      |          |
| Early Progenitor (EP)           | 4152               | 3.38E-07                                         |          | 3014                | 4.88E-09                                         | *        |
| Intermediate Progenitor (IP)    | 406                | 5.95E-17                                         | **       | 257                 | 1.95E-15                                         | **       |
| Late Progenitor (LP)            | 413                | 9.18E-17                                         | **       | 256                 | 2.27E-13                                         | *        |
| GMP                             | 781                | 4.16E-28                                         | ***      | 366                 | 1.30E-31                                         | ****     |
| MEP                             | 951                | 1.12E-04                                         |          | 975                 | 3.53E-05                                         |          |
| Pro Erythroblast                | 600                | 6.02E-23                                         | ***      | 223                 | 5.90E-23                                         | ***      |
| Basophilic Erythroblast         | 1155               | 2.43E-32                                         | ****     | 610                 | 1.32E-31                                         | ****     |
| Polychromatophilic Erythroblast | 1830               | 1.84E-25                                         | ***      | 2379                | 1.21E-19                                         | **       |
| Monoblast (Mb)                  | 4285               | 4.47E-40                                         | ****     | 1202                | 4.00E-37                                         | ****     |
| Promonocyte                     | 672                | 9.79E-42                                         | ****     | 45                  | 1.37E-43                                         | ****     |
| Monocyte                        | 18873              | 4.59E-33                                         | ****     | 3860                | 4.25E-26                                         | ***      |
| Myeloid                         | 68831              | 9.23E-27                                         | ***      | 28198               | 3.76E-21                                         | **       |
| cDCs                            | 6079               | 6.09E-23                                         | ***      | 5820                | 8.35E-18                                         | **       |
| Platelet                        | 5919               | 1.36E-31                                         | ****     | 3543                | 9.40E-17                                         | **       |
| Promyelo/myelocyte (P/M)        | 6448               | 7.13E-37                                         | ****     | 2288                | 9.31E-27                                         | ***      |
| Neutrophils                     | 152761             | 2.50E-35                                         | ****     | 80709               | 2.50E-22                                         | ***      |
| Pre pDCs                        | 5304               | 1.30E-31                                         | ****     | 4128                | 3.46E-24                                         | ***      |
| pDCs                            | 4707               | 1.88E-25                                         | ***      | 2671                | 5.33E-14                                         | *        |
| Basophils (Baso)                | 3360               | 0.044257778                                      |          | 2025                | 0.044280291                                      |          |
| Double Negative T               | 6481               | 7.23E-04                                         |          | 1718                | 0.144161372                                      |          |
| CD4+ Naïve (CD4+N)              | 38811              | 0.001439377                                      |          | 37930               | 0.011583733                                      |          |
| CD4+ Memory (CD4+M)             | 54667              | 0.001435782                                      |          | 33170               | 0.03251306                                       |          |
| CD8+ Naïve (CD8+N)              | 55446              | 0.011573134                                      |          | 35609               | 1.41E-06                                         |          |
| CD8+ Memory (CD8+M)             | 65202              | 0.003502373                                      |          | 32347               | 0.059233529                                      |          |
| NKT                             | 20754              | 8.97E-04                                         |          | 3869                | 0.016618434                                      |          |
| NK                              | 51667              | 6.48E-13                                         | *        | 35749               | 1.56E-08                                         | *        |
| Pro B                           | 297                | 8.99E-15                                         | **       | 343                 | 2.94E-15                                         | **       |
| Pre B I                         | 919                | 2.49E-07                                         |          | 439                 | 5.40E-06                                         |          |
| Pre B II                        | 4334               | 3.68E-21                                         | **       | 725                 | 1.92E-19                                         | **       |
| Early Immature B (E-iB)         | 13071              | 0.00288132                                       |          | 3947                | 6.34E-05                                         |          |
| Immature B (iB)                 | 43751              | 0.016628616                                      |          | 16977               | 8.97E-04                                         |          |
| Plasma Cells                    | 2882               | 1.17E-37                                         | ****     | 441                 | 7.04E-31                                         | ****     |

| p-value symbol key |           |
|--------------------|-----------|
| >1E-7              | no symbol |
| 1E-7 to 1E-14      | *         |
| 1E-14 to 1E-21     | **        |
| 1E-21 to 1E-28     | ***       |
| < 1E-28            | ****      |

# KimmeY, Supplementary Figure 1

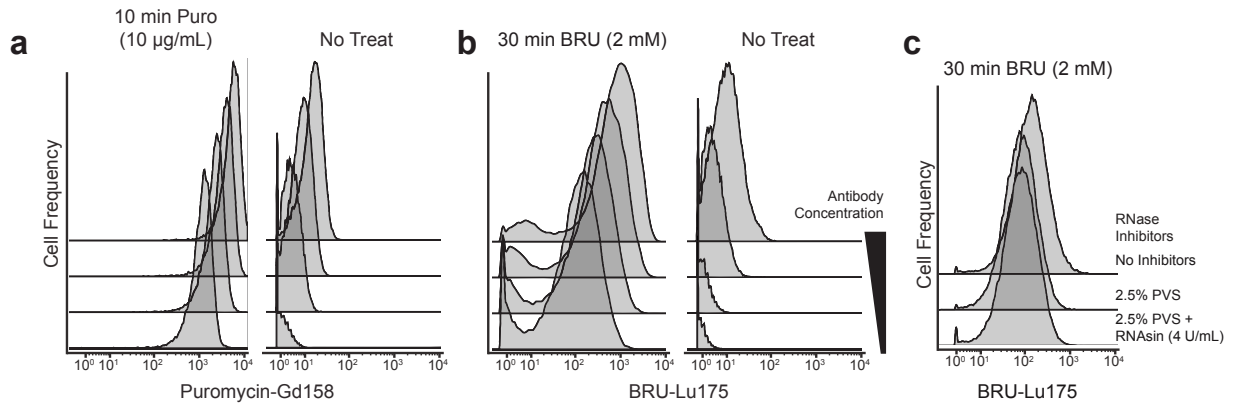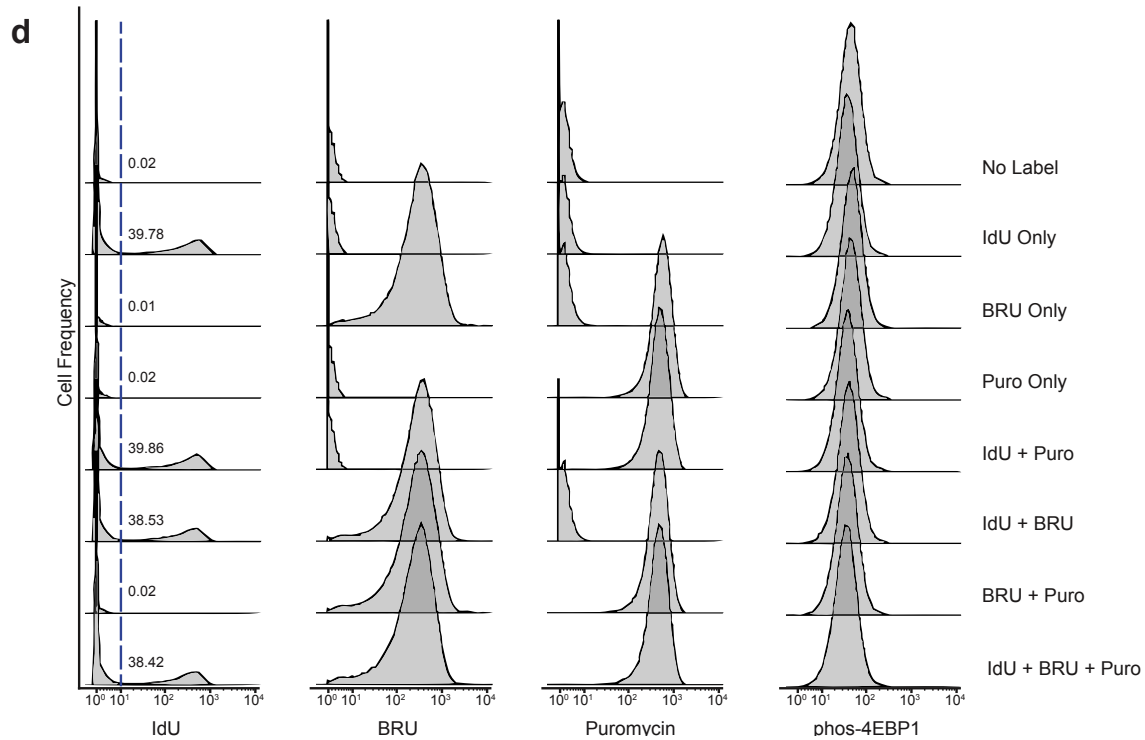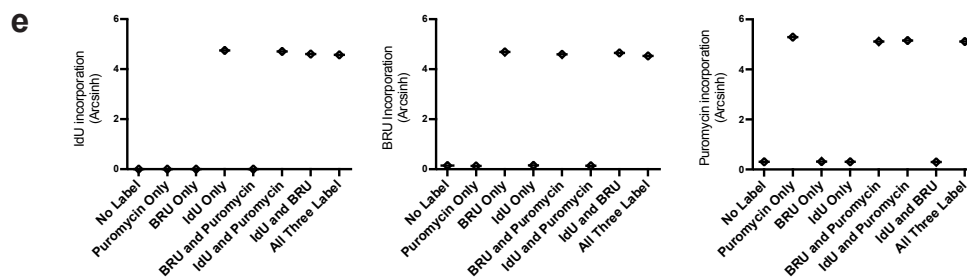

**f**

| Conditions                   | Friedman-Rafsky p-value |                |                      |
|------------------------------|-------------------------|----------------|----------------------|
|                              | IdU and p4EBP1*         | BRU and p4EBP1 | Puromycin and p4EBP1 |
| All Three Label vs: No Label | 3.14259E-34             | 1.42849E-42    | 2.74228E-44          |
| Puromycin Only               | 1.90175E-30             | 1.42849E-42    | 0.238951             |
| BRU Only                     | 2.12653E-38             | 0.197216       | 2.74228E-44          |
| IdU Only                     | 0.388260                | 5.38E-42       | 2.74228E-44          |
| BRU and Puromycin            | 5.46345E-32             | 0.443564       | 0.443569             |
| IdU and Puromycin            | 0.500000                | 1.44225E-42    | 0.388257             |
| IdU and BRU                  | 0.388227                | 0.388248       | 2.76983E-44          |
| All Three Label              | 0.500000                | 0.500000       | 0.500000             |



**Supplementary Figure 1:** Validation of SOM3B labeling reagents. **a** Human embryonic kidney 293T (HEK 293T) cells labeled with puromycin (left) and untreated (right), stained with increasing concentration of isotope conjugated anti-puromycin antibody. **b** HeLa cells labeled with BRU (left) and untreated (right), stained with increasing concentration of anti-BRdU antibody (concentrations; 1, 2, 4, 8  $\mu\text{g}/\text{mL}$ ). **c** Histograms of detected BRU in HeLa cells stained with antibody in the presence or absence of RNase inhibitors. **d** Analysis of Jurkat cells labeled with one or combinations of SOM<sub>3</sub>B labeling reagents. **e** Quantification of bootstrapped median values for data in **d**, error bars indicate 95 percent bootstrap confidence interval. **f** Freidman-Rafsky probability values for data in **c** and **d** (\*45-48k single cells for IdUpositive evaluations [see methods], 115-120k single cell events for BRU and puromycin evaluations). Experiments were performed multiple times, representative plots displayed in **a**, **b**, and **c** with 40,000 to 100,000+ single cell events per condition.

## KimmeY, Supplementary Figure 2

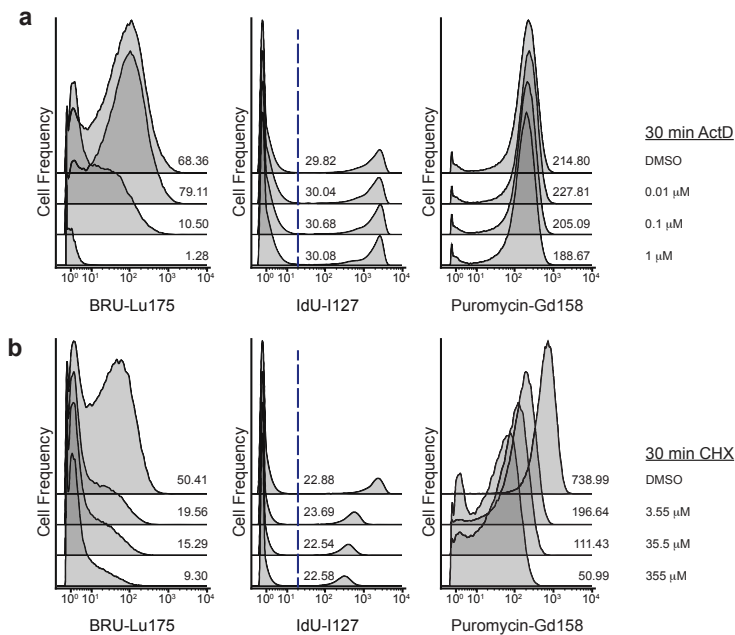

**Supplementary Figure 2: Dose-dependent block of BRU and puromycin incorporation with specific transcription and translation inhibitors. a** SOM<sub>3</sub>B analyses in HeLa cells treated with increasing concentration of active RNA synthesis inhibitor Actinomycin D before labeling. **b** SOM<sub>3</sub>B analyses in HeLa cells treated with increasing concentration of active translation inhibitor Cycloheximide before labeling. Inlaid histogram values are medians for BRU and puromycin incorporation, and frequency of cells positive for IdU incorporation. Experiments were performed multiple times, representative plots displayed with 100,000+ single cell events per condition.

# KimmeY, Supplementary Figure 3

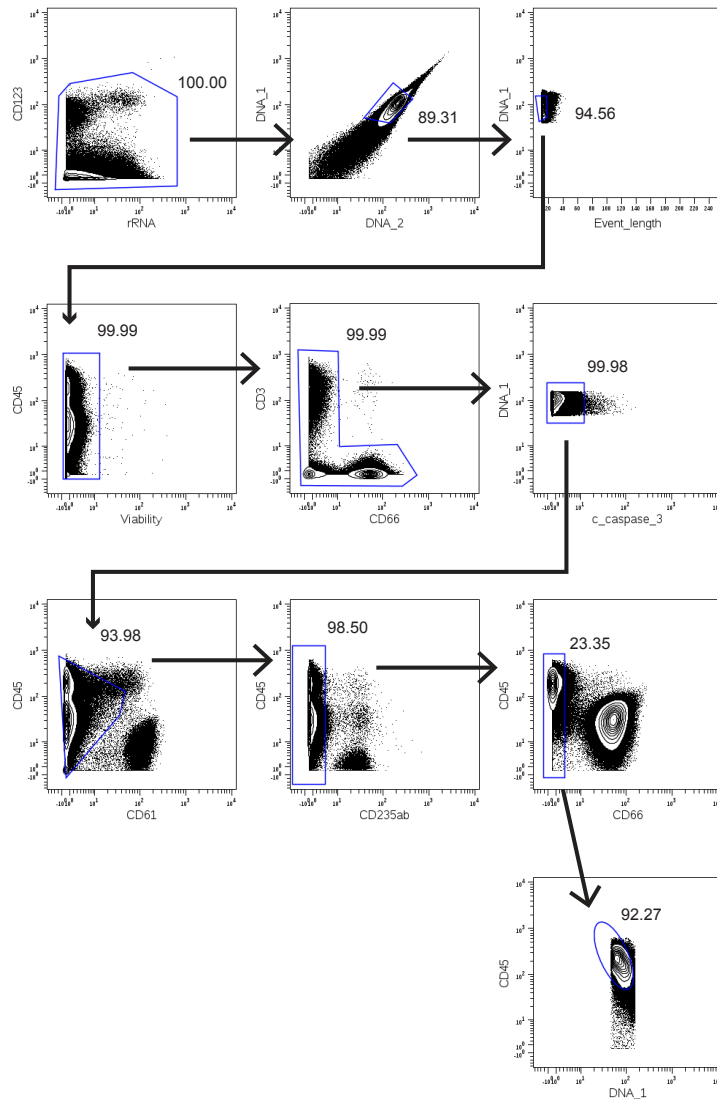

**Supplementary Figure 3:** Gating scheme to isolate peripheral immune mononuclear cells *in silico*. Mass-cytometry gating scheme to isolate mononuclear cell events from whole blood prior to phenotypic clustering with by SPADE. Doublets, debris, non-viable (cisplatin positive), and non-apoptotic (c[leaved]\_caspase\_3 positive) events were removed. Mononuclear cells are isolated by removal of platelets (CD61), red blood cells (CD235ab), and granulocytes (CD66, see Supplementary Table 3). Arrows indicate gating hierarchy.

# KimmeY, Supplementary Figure 4

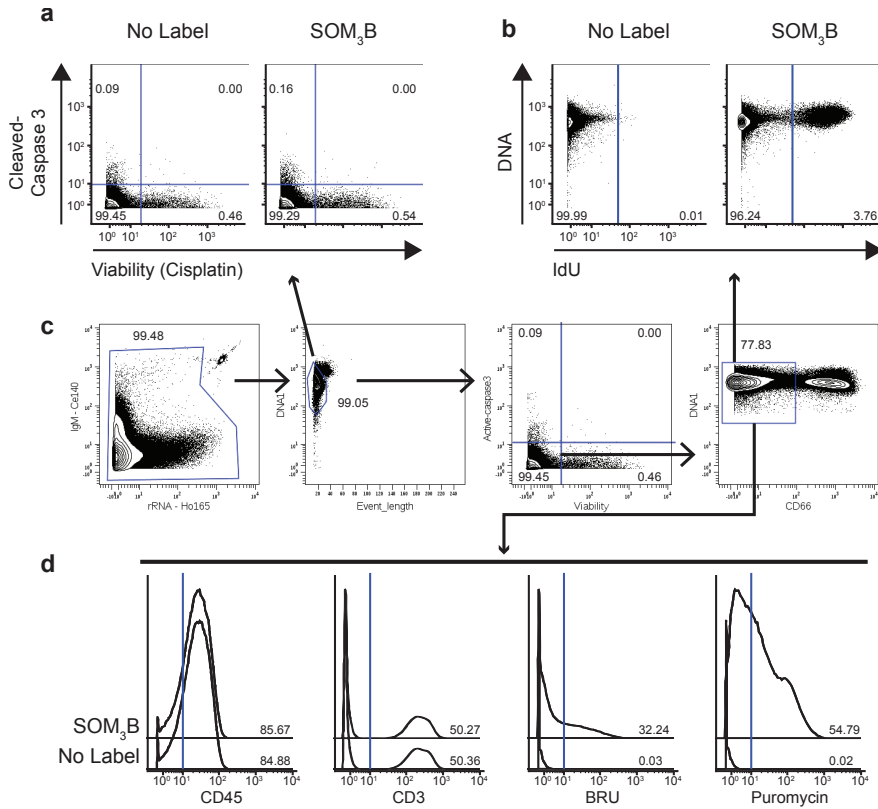

**Supplemental Figure 4:** Bone marrow cell fitness and surface protein expression are unperturbed by labeling with SOM<sub>3</sub>B reagents. **a** Biaxial plots with inlaid frequency of bone marrow cells undergoing apoptosis (cleaved-Caspase3 positive) and non-viable cells (positive cisplatin staining) when unlabeled or labeled with SOM<sub>3</sub>B reagents. **b** Frequency of bone marrow cells positive for IdU incorporation after labeling with SOM<sub>3</sub>B reagents. **c** *In silico* gating scheme for plots in panel **a**, **b**, and **d**. **d** Histograms of surface protein expression and SOM<sub>3</sub>B parameters in unlabeled and labeled bone marrow cells. Inlaid quadrant numbers indicate the percent of total events within each gate, 300,000+ single cell events per condition.

## Kimmey, Supplementary Figure 5

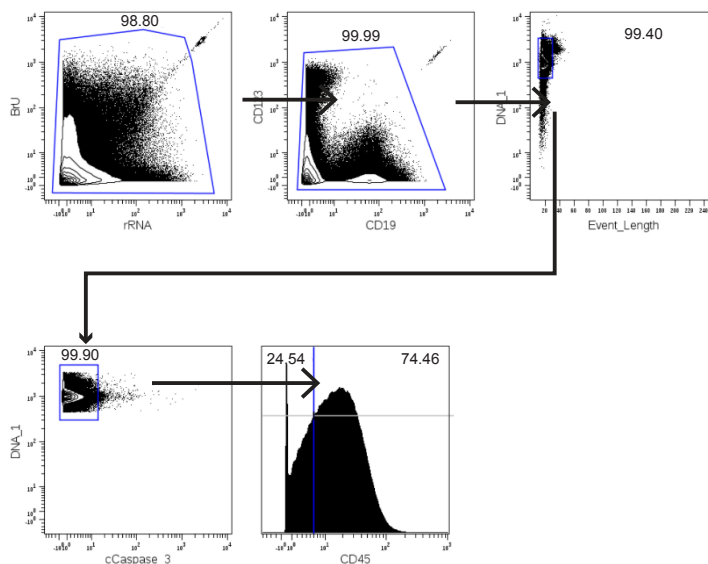

**Supplemental Figure 5:** Gating scheme to isolate bone marrow mononuclear immune cells *in silico*. Mass-cytometry gating scheme to isolate CD45 positive, mononuclear bone marrow cell events for adult donors before phenotypic clustering with SPADE and developmental progression analysis with Wanderlust. Arrows indicate gating hierarchy.

# KimmeY, Supplementary Figure 6

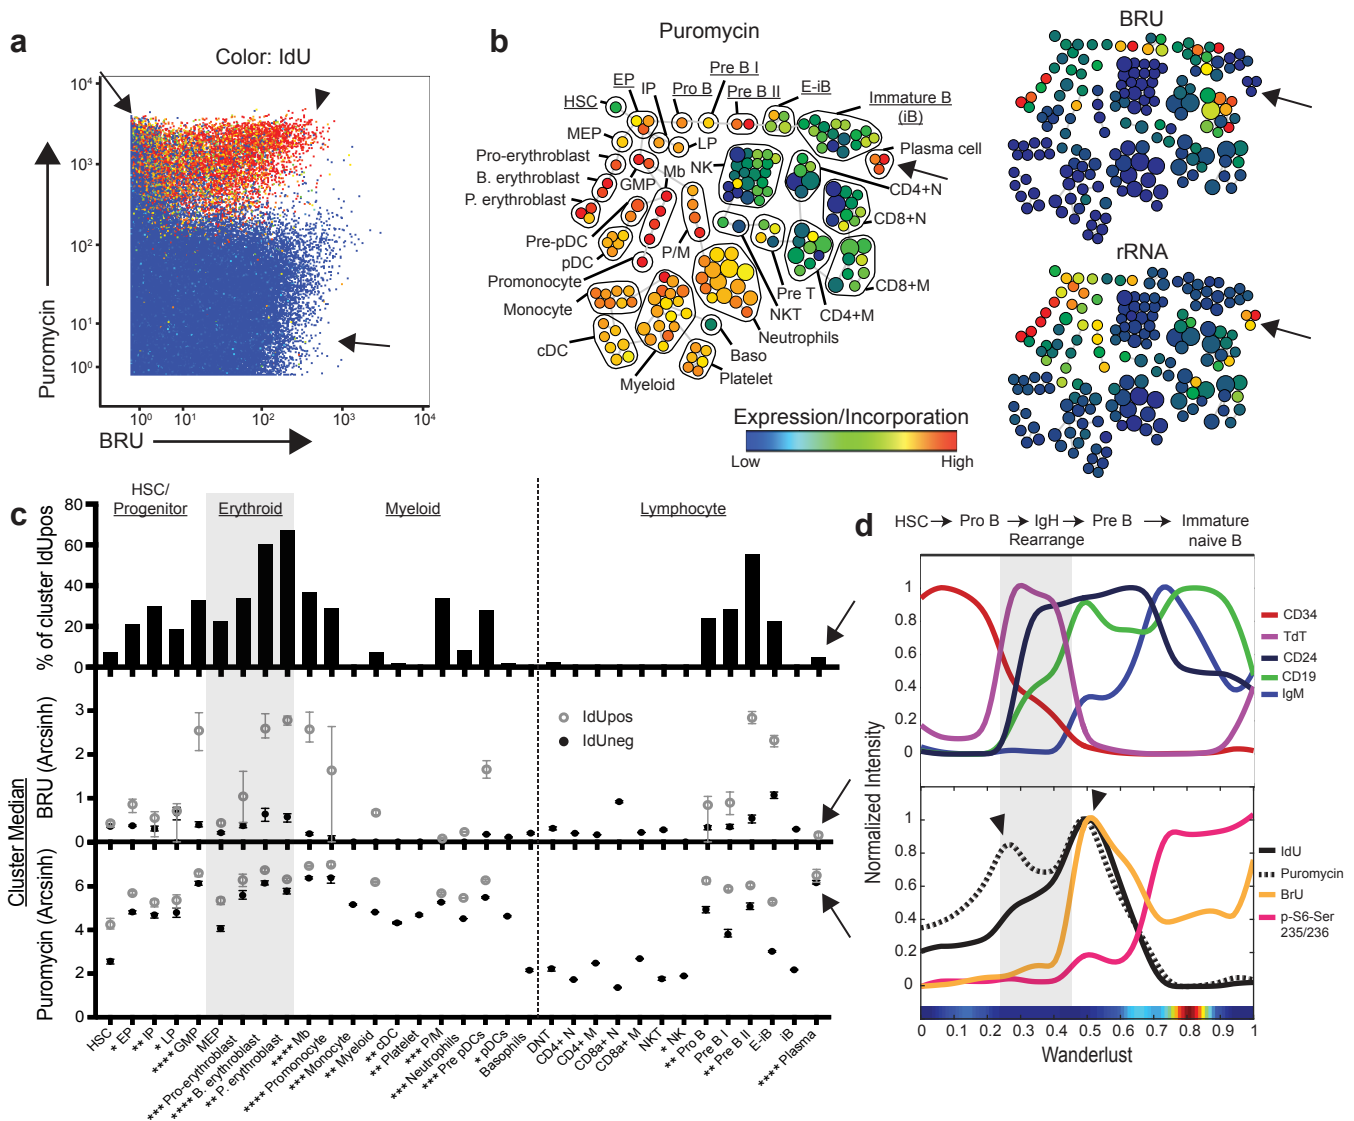

**Supplemental Figure 6:** Dynamic DNA, RNA, and protein synthesis across a healthy human hematopoietic continuum can be linked to cellular function and developmental identity (healthy human donor #2). **a** Plot of CD45pos immune cells from a second healthy human bone marrow donor (color overlaid: IdU incorporation, color range: 0, 410 ion counts). Arrows highlight cells with high activity of RNA or protein synthesis, arrowhead indicates high biosynthesis activity of all three biomolecules. **b** Manually annotated SPADE map of single cell data in **a**, clustered according to immune-cell phenotype and color-overlaid by the median incorporated puromycin (left), BRU (top right) and ribosomal RNA expression (bottom right) for each cluster. **c** Quantification of DNA synthesis (percent IdU positive), RNA and protein synthesis for each phenotypic group in **b**. Values are displayed for both IdU positive and IdU negative sub-populations only when greater than 4% of the parent population is positive for IdU. Error bars, 95 percent bootstrap confidence interval, see Supplementary Table 6 for total cell observations in each phenotypic group. **d** Wanderlust trajectory analysis of B-cell lineage (underlined in **b**) ordered according to developmental pseudo-time with functional markers (top), and activity of DNA, RNA, protein synthesis, and p-S6 expression in the same B-cell developmental axis (bottom). Arrowheads highlight developmental stages immediately before, and after, B-cell somatic recombination. Experiment was performed on two independent donors, with additional donor data presented in Figure 5. p-values are expressed as follows:  $1.0 \times 10^{-7} > p > 1.0 \times 10^{-14}^*$ ;  $1.0 \times 10^{-14} > p > 1.0 \times 10^{-21}^{**}$ ;  $1.0 \times 10^{-21} > p > 1.0 \times 10^{-28}^{***}$ ;  $p < 1.0 \times 10^{-28}^{****}$ . Significance was

obtained by the Friedman-Rafsky test, evaluating BRU and puromycin incorporation in a given phenotypic population relative to HSC.

## Supplementary References

1. Han, X. *et al.* Immunophenotypic study of basophils by multiparameter flow cytometry. *Arch. Pathol. Lab. Med.* **132**, 813–819 (2008).
2. van Lochem, E. G. *et al.* Immunophenotypic differentiation patterns of normal hematopoiesis in human bone marrow: reference patterns for age-related changes and disease-induced shifts. *Cytometry B. Clin. Cytom.* **60**, 1–13 (2004).
3. Attar, A. Changes in the Cell Surface Markers During Normal Hematopoiesis: A Guide to Cell Isolation. *Glob. J. Hematol. Blood Transfus.* **1**, 20–28 (2014).
4. Manz, M. G., Miyamoto, T., Akashi, K. & Weissman, I. L. Prospective isolation of human clonogenic common myeloid progenitors. *Proc. Natl. Acad. Sci. U. S. A.* **99**, 11872–11877 (2002).
5. Majeti, R., Park, C. Y. & Weissman, I. L. Identification of a Hierarchy of Multipotent Hematopoietic Progenitors in Human Cord Blood. *Cell Stem Cell* **1**, 635–645 (2007).
6. Maecker, H. T., McCoy, J. P. & Nussenblatt, R. Standardizing immunophenotyping for the Human Immunology Project. *Nat. Rev. Immunol.* **12**, (2012).
7. Bendall, S. C. *et al.* Single-Cell Mass Cytometry of Differential Immune and Drug Responses Across a Human Hematopoietic Continuum. *Science (80-. ).* **332**, 687–696 (2011).
8. Cserti-Gazdewich, C. M. *et al.* Quantitation of CD36 (platelet glycoprotein IV) expression on platelets and monocytes by flow cytometry: Application to the study of Plasmodium falciparum malaria. *Cytom. Part B - Clin. Cytom.* **76**, 127–134 (2009).
9. Nutt, S. L., Hodgkin, P. D., Tarlinton, D. M. & Corcoran, L. M. The generation of antibody-secreting plasma cells. *Nat. Rev. Immunol.* **15**, 160–171 (2015).
10. Juvet, S. C. & Zhang, L. Double negative regulatory T cells in transplantation and autoimmunity: Recent progress and future directions. *J. Mol. Cell Biol.* **4**, 48–58 (2012).
